# Supplementary material for: Formulation and Biological Evaluation of Mesoporous Silica Nanoparticles Loaded with Combinations of Sortase A Inhibitors and Antimicrobial Peptides
Source: MDPI journal article supplement (doi:10.3390/pharmaceutics14050986), 2022-05-04
Supplement: s1 [file s1]

# Supplementary Materials: Formulation and Biological Evaluation of Mesoporous Silica Nanoparticles Loaded with Combinations of Sortase A Inhibitors and Antimicrobial Peptides

Sitah Alharthi, Zyta M. Ziora, Taskeen Janjua, Amirali Popat, Peter M. Moyle

**Table S1.** The concentrations of the sortase A inhibitor (SrtAIs; TC, CUR, QC, and BR)-loaded MCM-41 and MCM-41-PO<sub>3</sub><sup>-</sup> MSNs, AMPs (PEX, INDO, and MASTO), and their combinations used in the cell viability study. Red values are the MICs of each compound.

| Compound                                      | Concentrations (µg/mL) |             |             |             |             |             |
|-----------------------------------------------|------------------------|-------------|-------------|-------------|-------------|-------------|
| PEX                                           | 50.0                   | 25.0        | 12.5        | 6.25        | 3.13        | 1.56        |
| INDO                                          | 150                    | 75.0        | 37.5        | 18.8        | 9.38        | 4.69        |
| MASTO                                         | 25.0                   | 12.5        | 6.26        | 3.13        | 1.57        | 0.78        |
| TC MCM-41                                     | 1000                   | 500         | 250         | 125         | 62.5        | 31.3        |
| CUR MCM-41                                    | 500                    | 250         | 125         | 62.5        | 31.3        | 15.6        |
| QC MCM-41                                     | 500                    | 250         | 125         | 62.5        | 31.3        | 15.6        |
| BR MCM-41                                     | 1000                   | 500         | 250         | 125         | 62.5        | 31.3        |
| TC MCM-41-PO <sub>3</sub> <sup>-</sup>        | 500                    | 250         | 125         | 62.5        | 31.3        | 15.6        |
| CUR MCM-41-PO <sub>3</sub> <sup>-</sup>       | 250                    | 125         | 62.5        | 31.3        | 15.6        | 7.81        |
| QC MCM-41-PO <sub>3</sub> <sup>-</sup>        | 500                    | 250         | 125         | 31.3        | 31.3        | 15.6        |
| BR MCM-41-PO <sub>3</sub> <sup>-</sup>        | 500                    | 250         | 125         | 62.5        | 31.3        | 15.6        |
| PEX + TC MCM-41                               | 12.5 + 125             | 6.25 + 62.5 | 3.13 + 31.3 | 1.56 + 15.6 | 0.78 + 7.81 | 0.39 + 3.91 |
| PEX + BR MCM-41                               | 12.5 + 62.5            | 6.25 + 31.3 | 3.13 + 15.6 | 1.56 + 7.81 | 0.79 + 3.91 | 0.39 + 1.95 |
| INDO + QC MCM-41                              | 37.5 + 125             | 18.8 + 62.5 | 9.38 + 31.3 | 4.68 + 15.6 | 2.34 + 7.81 | 1.17 + 3.91 |
| MASTO + CUR MCM-41                            | 25.0 + 62.5            | 12.5 + 31.3 | 6.25 + 15.6 | 3.13 + 7.81 | 1.56 + 3.91 | 0.78 + 1.95 |
| PEX + TC MCM-41-PO <sub>3</sub> <sup>-</sup>  | 12.5 + 62.5            | 6.25 + 31.3 | 3.13 + 15.6 | 1.56 + 7.81 | 0.79 + 3.91 | 0.39 + 1.95 |
| PEX + BR MCM-41-PO <sub>3</sub> <sup>-</sup>  | 12.5 + 62.5            | 6.25 + 31.3 | 3.13 + 15.6 | 1.56 + 7.81 | 0.79 + 3.91 | 0.39 + 1.95 |
| INDO + QC MCM-41-PO <sub>3</sub> <sup>-</sup> | 37.5 + 125             | 18.8 + 62.5 | 9.38 + 31.3 | 4.68 + 15.6 | 2.34 + 7.81 | 1.17 + 3.91 |

## MCM-41

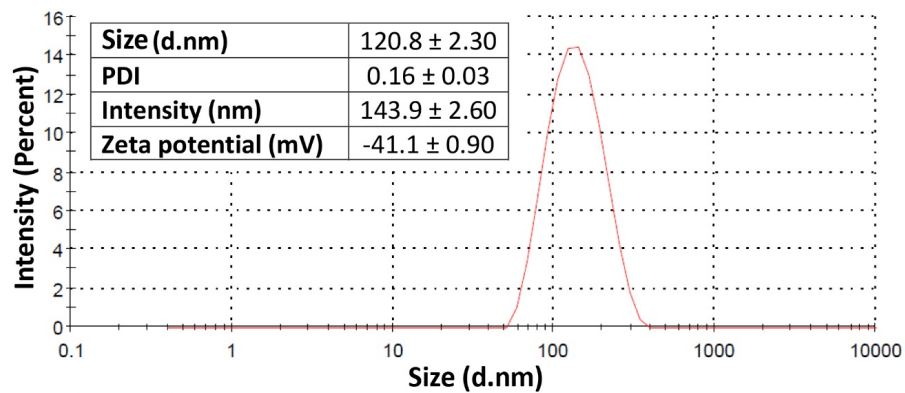

## MCM-41-PO<sub>3</sub><sup>-</sup>

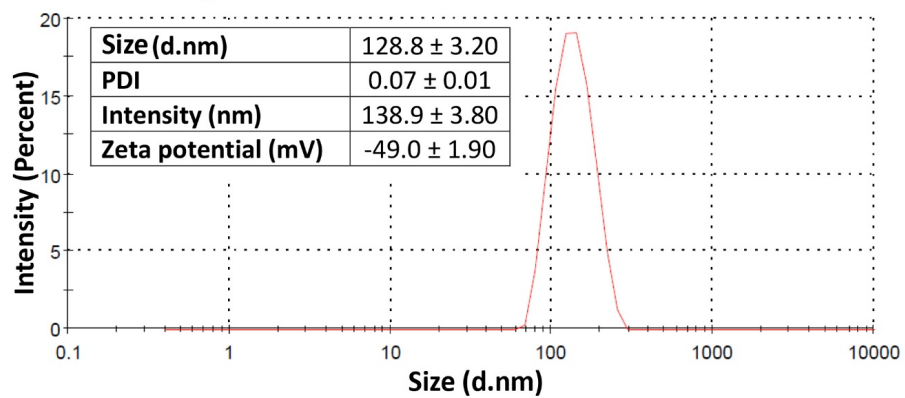

**Figure S1.** Size, polydispersity index (PDI), intensity mean, and zeta potential of MCM-41 and MCM-41 PO<sub>3</sub><sup>-</sup> MSNs.

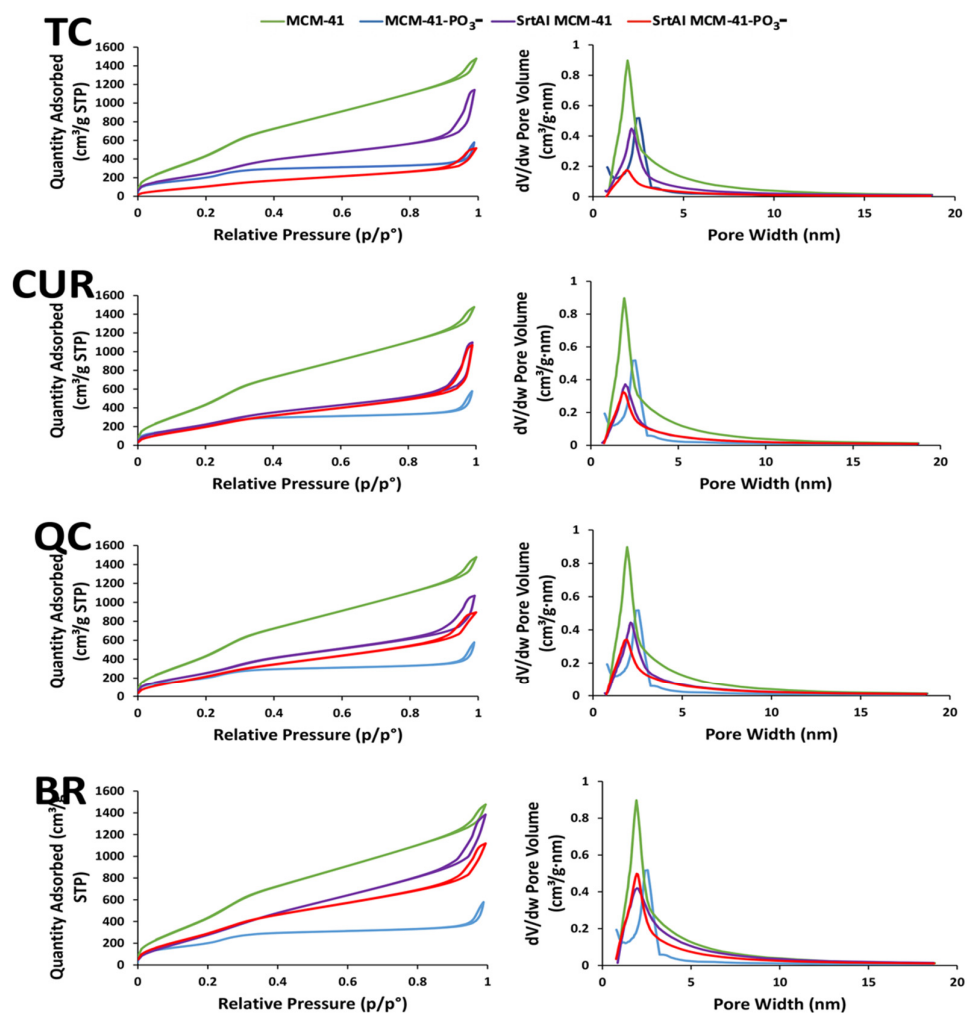

**Figure S2.** N<sub>2</sub>-physorption isothermal analysis and pore size distribution of SrtAl-loaded and non-loaded MCM-41 and MCM-41-PO<sub>3</sub><sup>-</sup> MSNs.

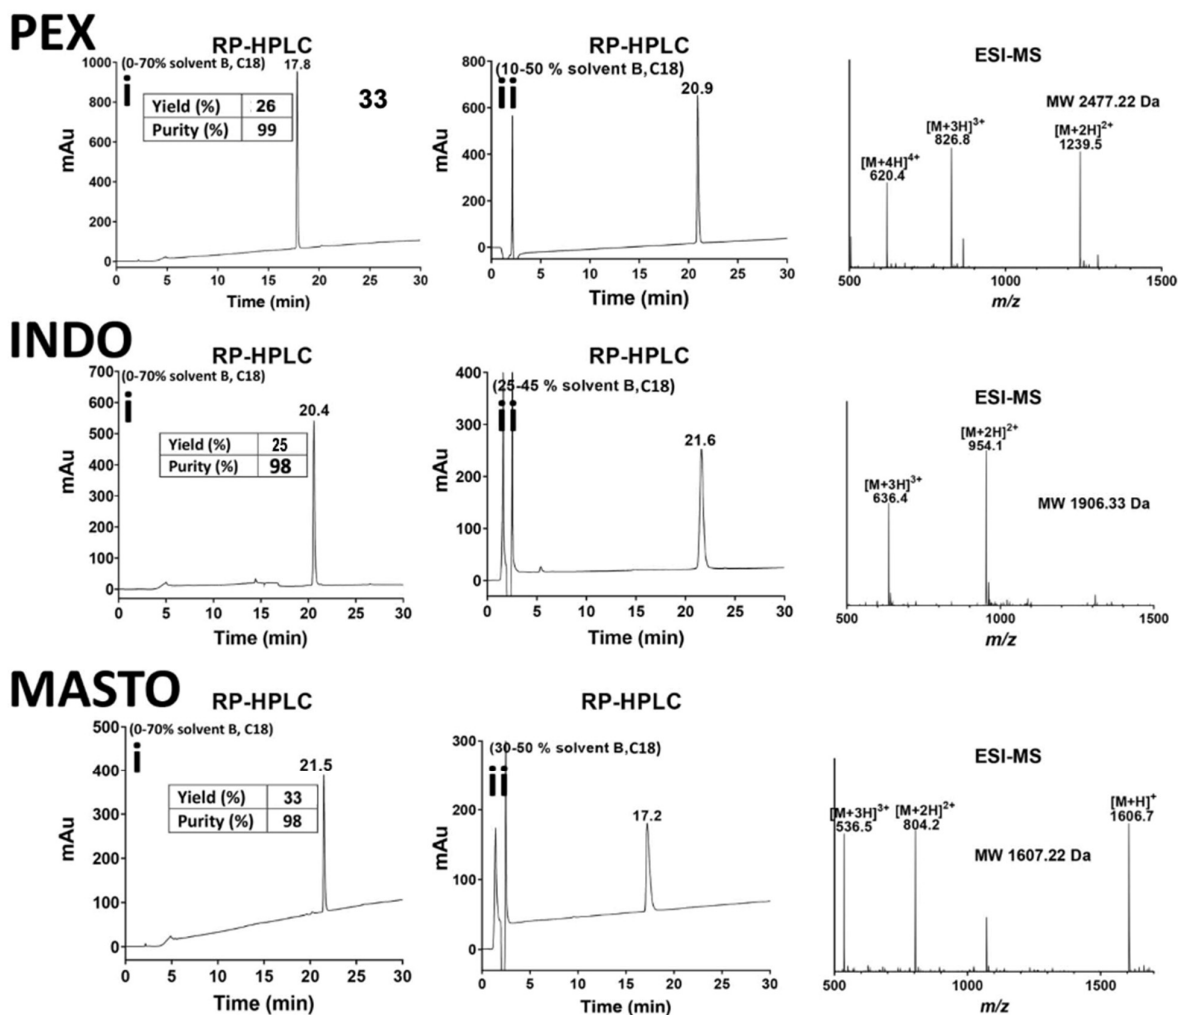

Figure S3. (i) Wide and (ii) narrow RP-HPLC gradients and ESI-MS data for purified PEX, INDO, and MASTO AMPs.

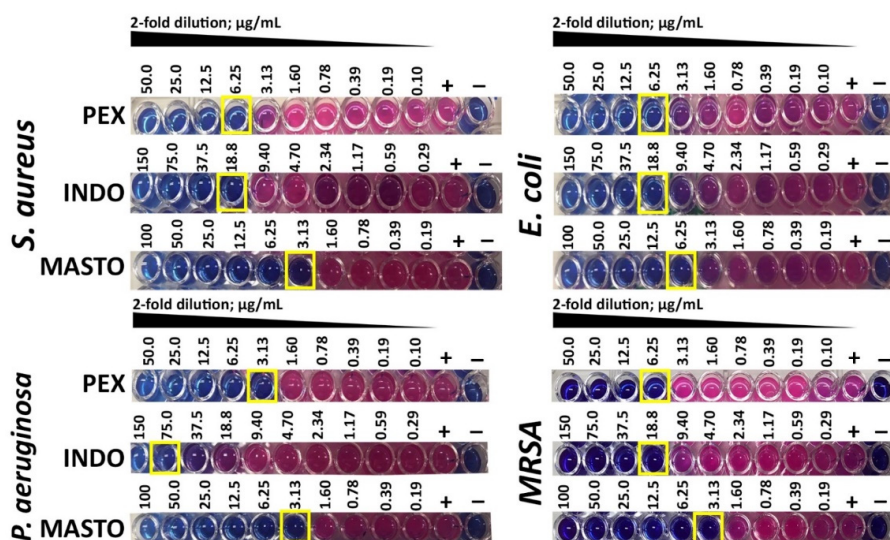

Figure S4. MICs of PEX, INDO, and MASTO against *S. aureus* ATCC 25923, *E. coli* ATCC 25922, *P. aeruginosa* ATCC27853, and MRSA ATCC43300 using the BMD assay.



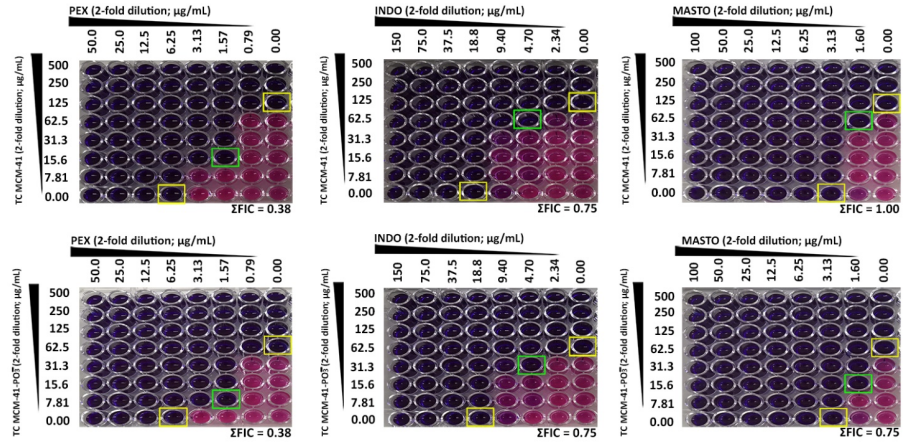

**Figure S5.** Fractional inhibitory concentration (FIC) index of TC MCM-41 and MCM-41-PO<sub>3</sub><sup>-</sup> in combination with antimicrobial peptides (AMPs; PEX, INDO, and MASTO) against *S. aureus* ATCC25923 using checkerboard assay.

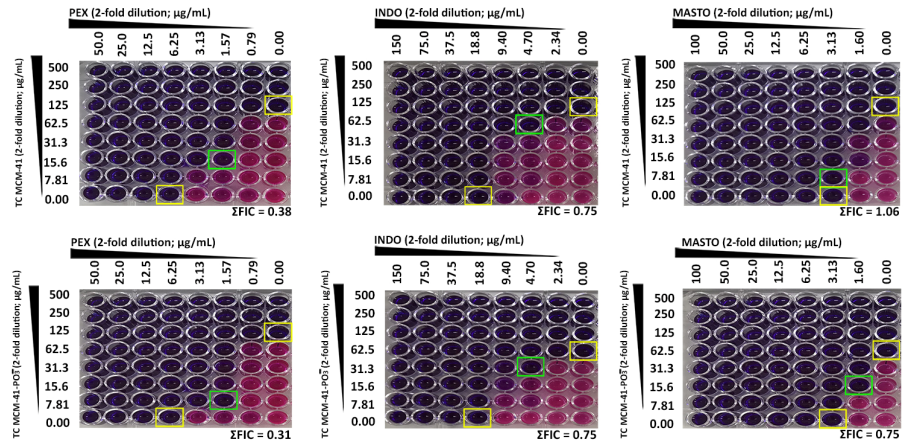

**Figure S6.** Fractional inhibitory concentration (FIC) index of TC MCM-41 and MCM-41-PO<sub>3</sub><sup>-</sup> in combination with antimicrobial peptides (AMPs; PEX, INDO, and MASTO) against MRSA ATCC43300 using checkerboard assay.

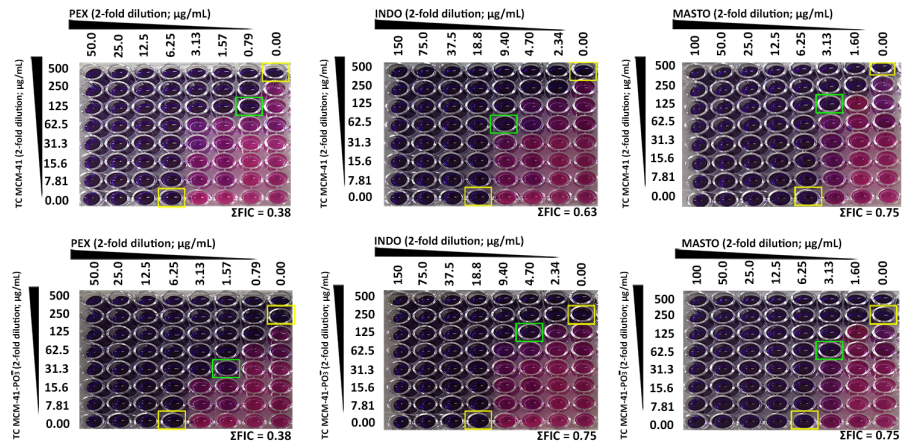

**Figure S7.** Fractional inhibitory concentration (FIC) index of TC MCM-41 and MCM-41-PO<sub>3</sub><sup>-</sup> in combination with antimicrobial peptides (AMPs; PEX, INDO, and MASTO) against *E. coli* ATCC25922 using checkerboard assay.

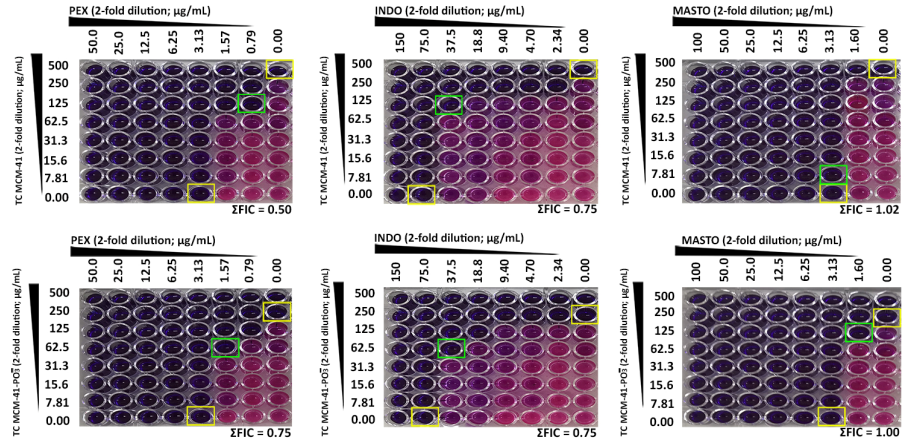

**Figure S8.** Fractional inhibitory concentration (FIC) index of TC MCM-41 and MCM-41-PO<sub>3</sub><sup>-</sup> in combination with antimicrobial peptides (AMPs; PEX, INDO, and MASTO) against *P. aeruginosa* ATCC27853 using checkerboard assay.

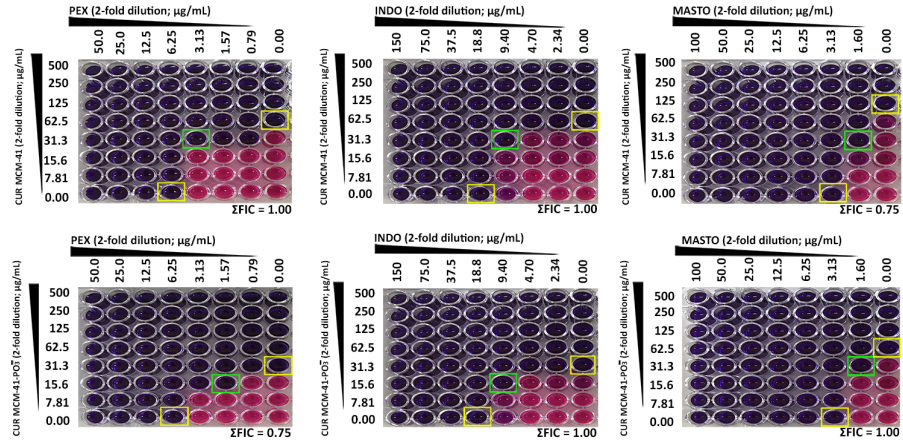

**Figure S9.** Fractional inhibitory concentration (FIC) index of CUR MCM-41 and MCM-41-PO<sub>3</sub><sup>-</sup> in combination with antimicrobial peptides (AMPs; PEX, INDO, and MASTO) against *S. aureus* ATCC25923 using checkerboard assay.

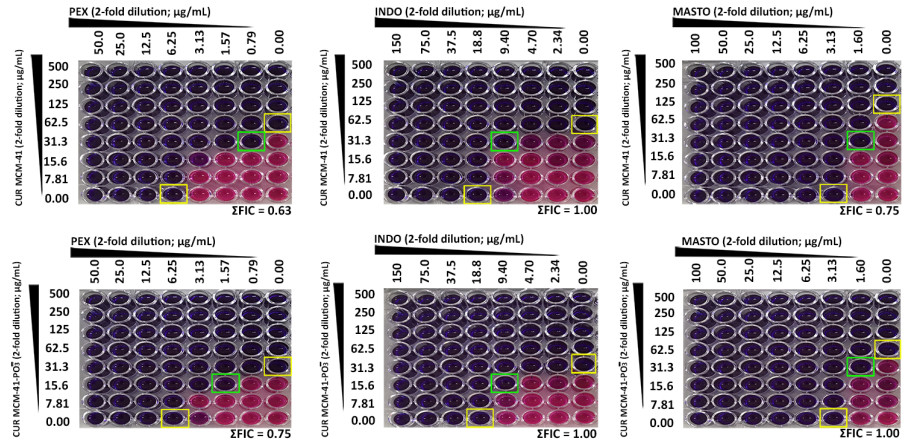

**Figure S10.** Fractional inhibitory concentration (FIC) index of CUR MCM-41 and MCM-41-PO<sub>3</sub><sup>-</sup> in combination with antimicrobial peptides (AMPs; PEX, INDO, and MASTO) against MRSA ATCC43300 using checkerboard assay.



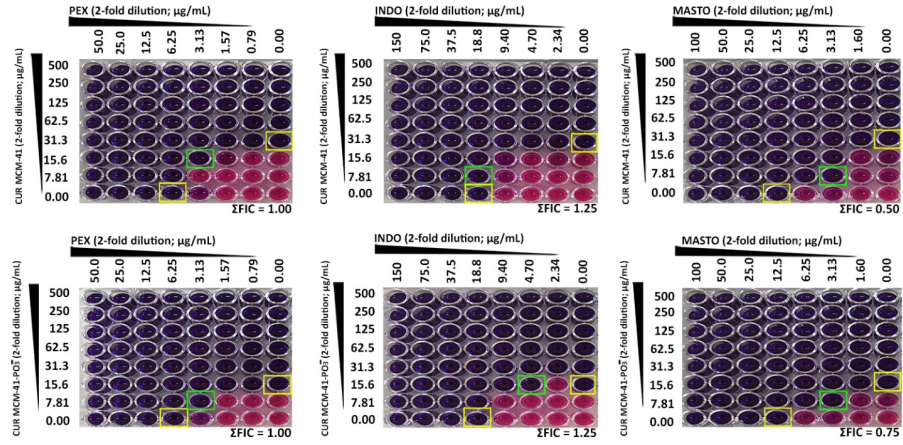

**Figure S11.** Fractional inhibitory concentration (FIC) index of CUR MCM-41 and MCM-41-PO<sub>3</sub><sup>-</sup> in combination with antimicrobial peptides (AMPs; PEX, INDO, and MASTO) against *E. coli* ATCC25922 using checkerboard assay.

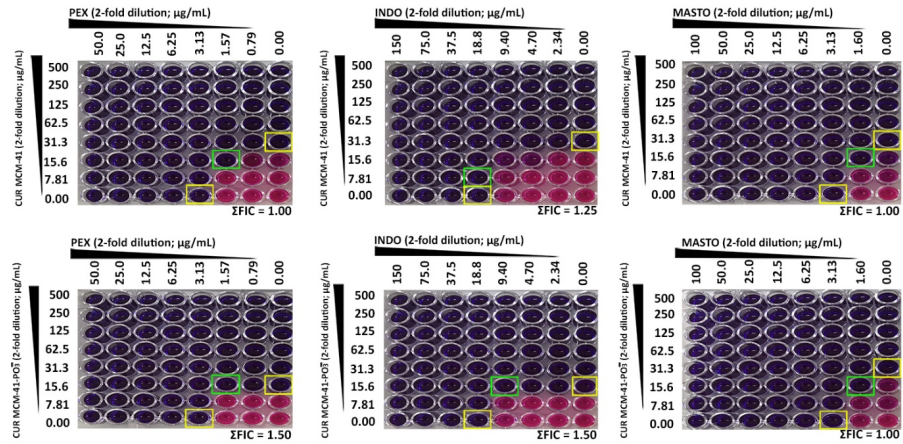

**Figure S12.** Fractional inhibitory concentration (FIC) index of CUR MCM-41 and MCM-41-PO<sub>3</sub><sup>-</sup> in combination with antimicrobial peptides (AMPs; PEX, INDO, and MASTO) against *P. aeruginosa* ATCC27853 using checkerboard assay.

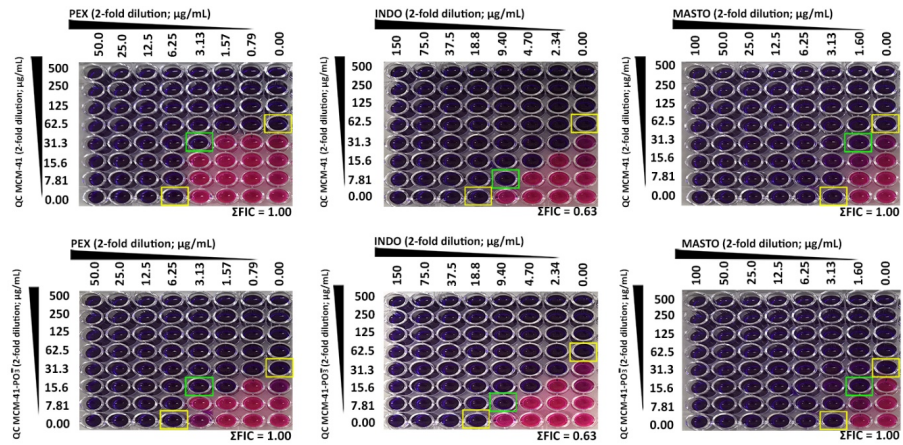

**Figure S13.** Fractional inhibitory concentration (FIC) index of QC MCM-41 and MCM-41-PO<sub>3</sub><sup>-</sup> in combination with antimicrobial peptides (AMPs; PEX, INDO, and MASTO) against *S. aureus* ATCC25923 using checkerboard assay.

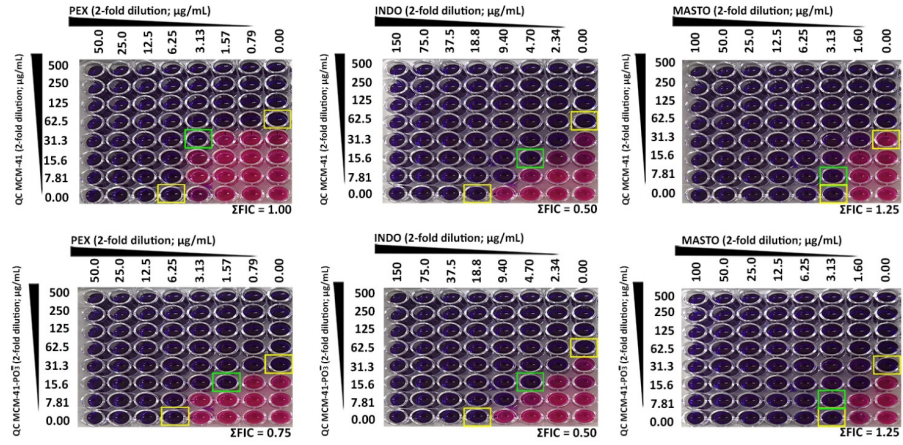

**Figure S14.** Fractional inhibitory concentration (FIC) index of QC MCM-41 and MCM-41-PO<sub>3</sub><sup>-</sup> in combination with antimicrobial peptides (AMPs; PEX, INDO, and MASTO) against MRSA ATCC43300 using checkerboard assay.

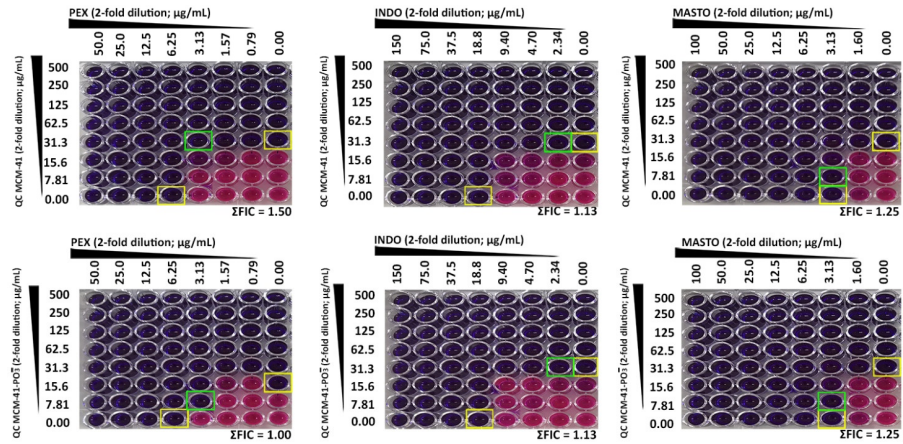

**Figure S15.** Fractional inhibitory concentration (FIC) index of QC MCM-41 and MCM-41-PO<sub>3</sub><sup>-</sup> in combination with antimicrobial peptides (AMPs; PEX, INDO, and MASTO) against *E. coli* ATCC25922 using checkerboard assay.

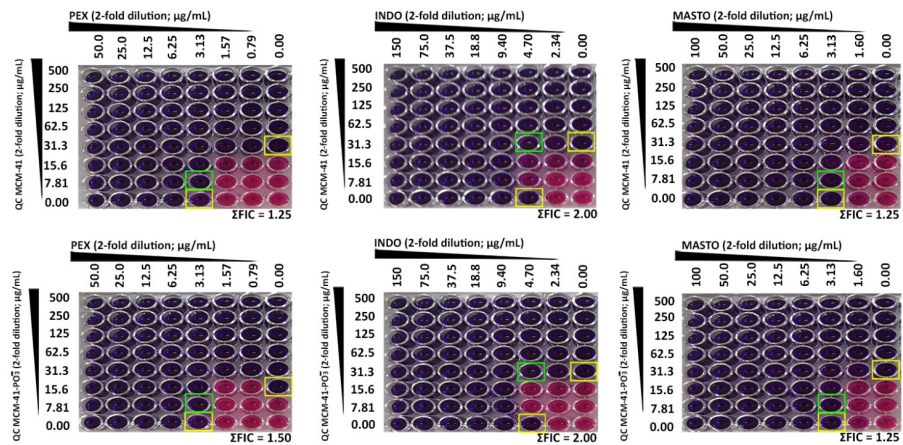

**Figure S16.** Fractional inhibitory concentration (FIC) index of QC MCM-41 and MCM-41-PO<sub>3</sub><sup>-</sup> in combination with antimicrobial peptides (AMPs; PEX, INDO, and MASTO) against *P. aeruginosa* ATCC27853 using checkerboard assay.



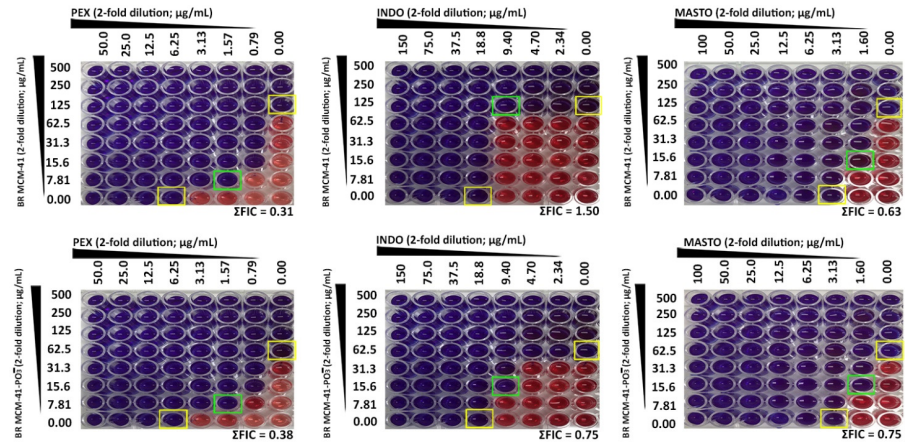

**Figure S17.** Fractional inhibitory concentration (FIC) index of BR MCM-41 and MCM-41-PO<sub>3</sub><sup>-</sup> in combination with antimicrobial peptides (AMPs; PEX, INDO, and MASTO) against MRSA ATCC43300 using checkerboard assay.

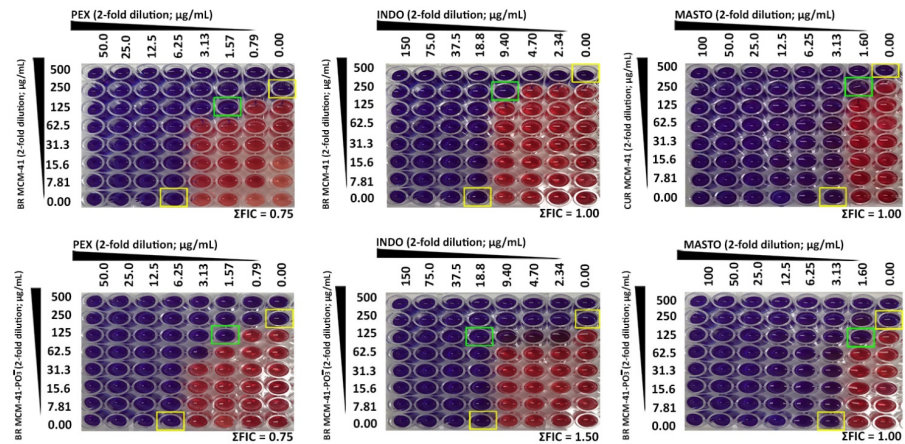

**Figure S18.** Fractional inhibitory concentration (FIC) index of BR MCM-41 and MCM-41-PO<sub>3</sub><sup>-</sup> in combination with antimicrobial peptides (AMPs; PEX, INDO, and MASTO) against *E. coli* ATCC 25922 using checkerboard assay.

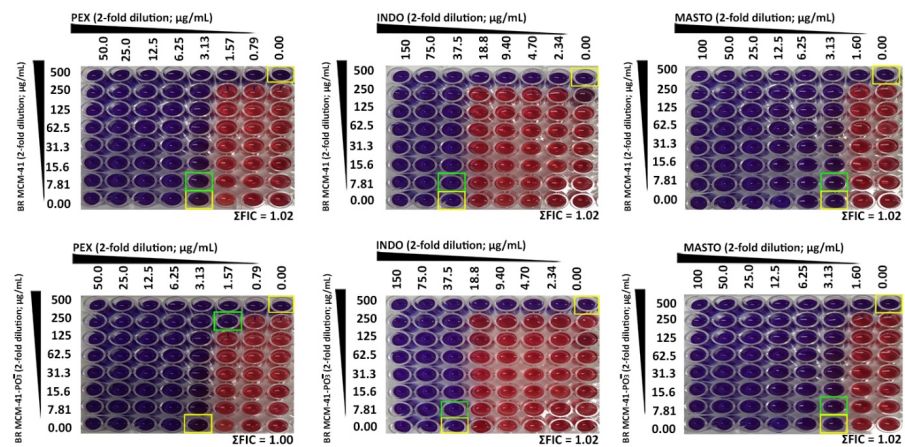

**Figure S19.** Fractional inhibitory concentration (FIC) index of BR MCM-41 and MCM-41-PO<sub>3</sub><sup>-</sup> in combination with antimicrobial peptides (AMPs; PEX, INDO, and MASTO) against *P. aeruginosa* ATCC27853 using checkerboard assay.

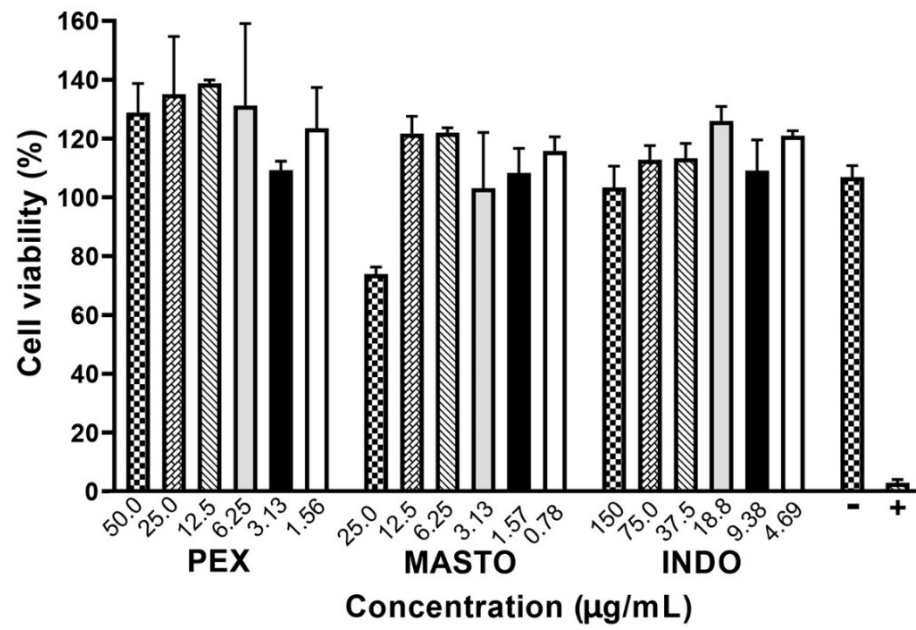

**Figure S20.** Effects of PEX, INDO, or MASTO on HEK-293 cell viability following 24 h incubation. Statistical analyses were performed using one-way ANOVA followed by Tukey's post-hoc test. No statistically significant differences were found ( $p > 0.05$ ). Data is expressed as mean  $\pm$  SD ( $n = 3$ ).

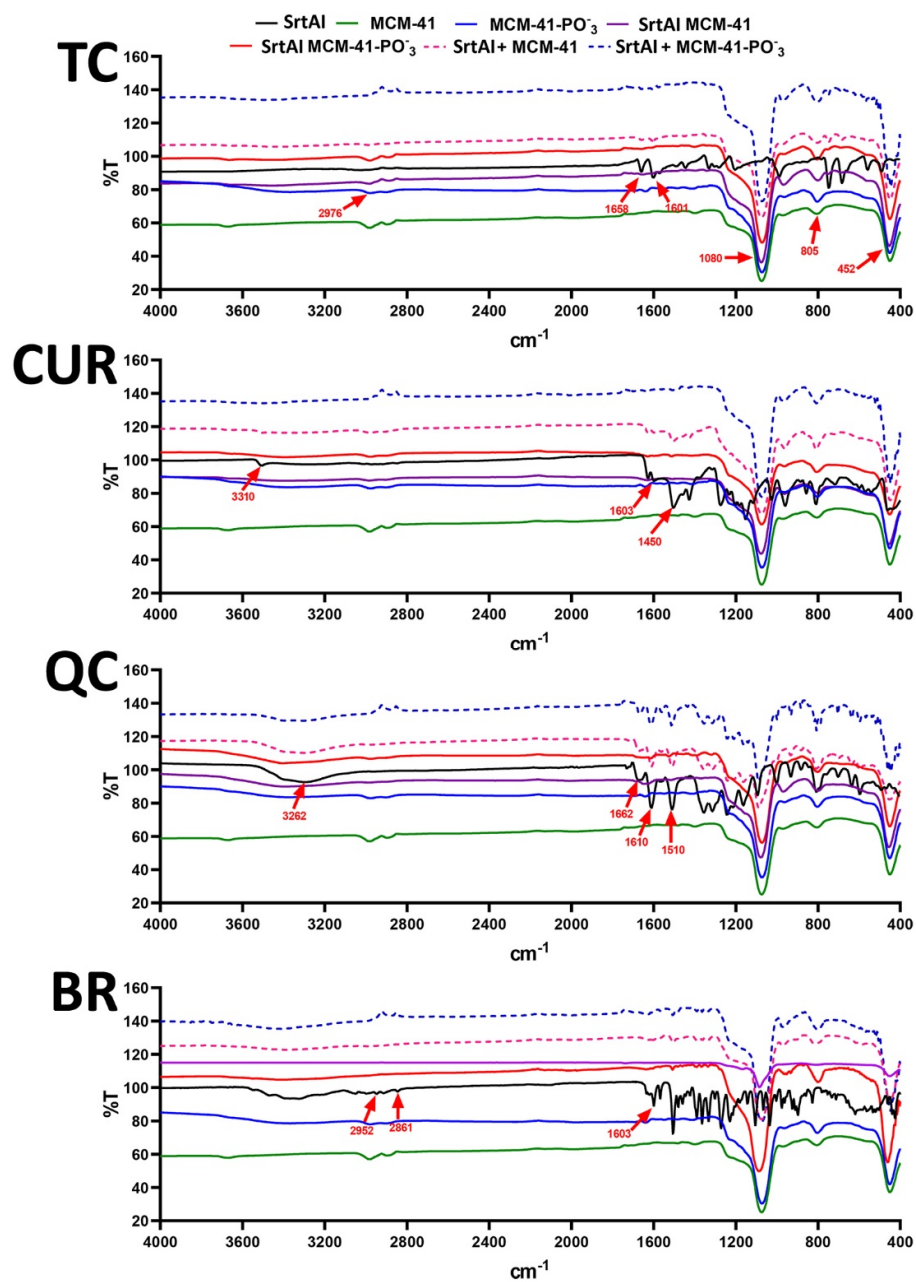

**Figure S21.** Fourier-transform infrared spectroscopy (FTIR) spectrum of the sortase A inhibitors (SrtAIs, TC, CUR, QC, and BR) alone and loaded into MCM-41 and MCM-41- $\text{PO}_3^-$ , and their physical mixture with MCM-41 and MCM-41- $\text{PO}_3^-$ .
